# Supplementary material for: Transcriptomic Dynamics of Active and Inactive States of Rho GTPase MoRho3 in Magnaporthe oryzae
Source: MDPI journal article supplement (doi:10.3390/jof8101060), 2022-10-11
Supplement: s1 [file s1]

Article

# Transcriptomic Dynamics of Active and Inactive States of Rho GTPase MoRho3 in *Magnaporthe oryzae*

Qian Li <sup>1,\*†</sup>, Xi Chen <sup>2,†</sup>, Lianyu Lin <sup>2,†</sup>, Lianhu Zhang <sup>2,3</sup>, Li Wang <sup>1</sup>, Jiandong Bao <sup>2</sup> and Dongmei Zhang <sup>2,\*</sup>

<sup>1</sup> Meishan Vocational Technical College, Ministerial and Provincial Joint Innovation Centre for Safety Production of Cross-Strait Crops, Fujian Agriculture and Forestry University, Fuzhou 350002, China

<sup>2</sup> State Key Laboratory for Ecological Pest Control of Fujian and Taiwan Crops, College of Plant Protection, Fujian Agriculture and Forestry University, Fuzhou 350002, China

<sup>3</sup> College of Agronomy, Jiangxi Agricultural University, Nanchang 330045, China

\* Correspondence: lixianqian5220@163.com (Q.L.); zhangdongmei127@126.com (D.Z.)

† These authors contributed equally to this work.

**A**

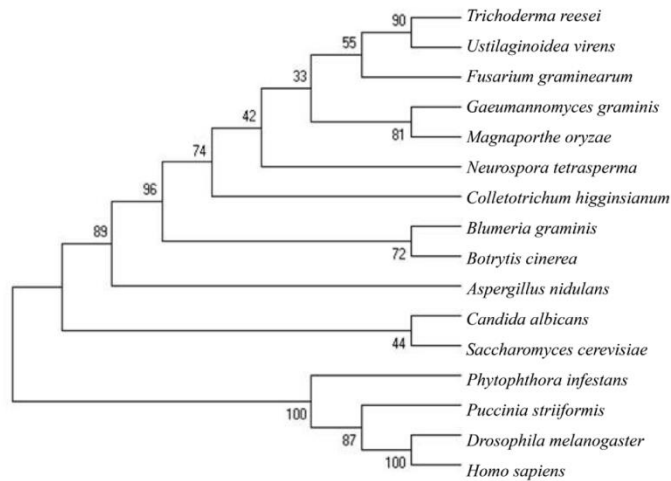

**B**

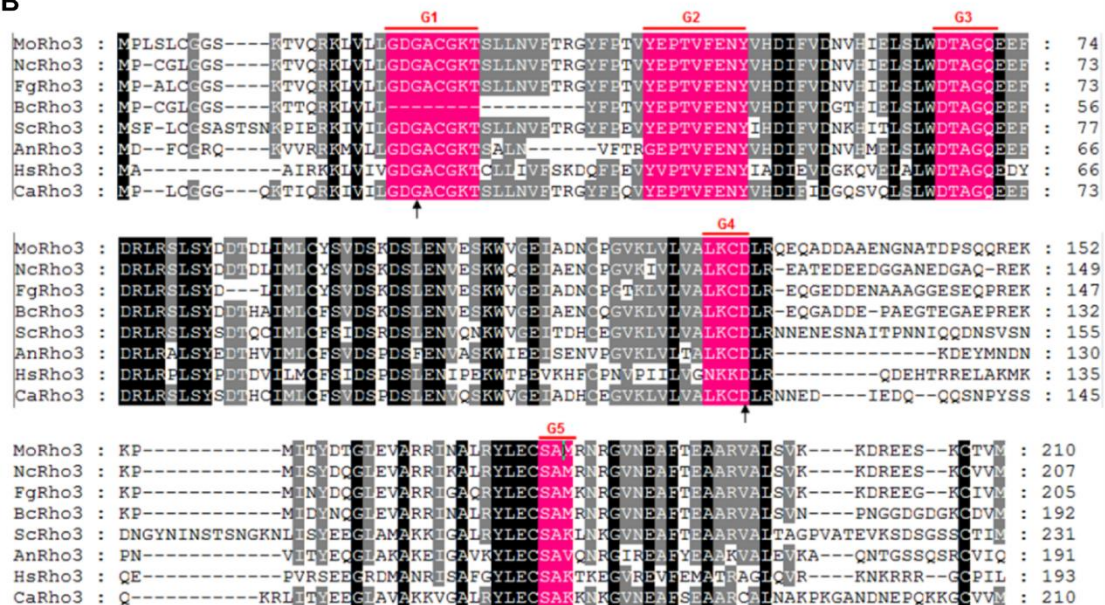

**Figure S1 (A)** Phylogenetic tree of Rho3 from fifteen species. **(B)** Amino acid sequence alignment of Rho3 from different species. Protein IDs: NcRho3 (XP\_965740.1), FgRho3 (XP\_011315782.1), BcRho3 (XP\_001559261.1), ScRho3 (AJR37036.1), AnRho3 (XP\_662386.1), HsRho3 (NP\_786886.1), CaRho3 (XP\_002418433.1).

**A**

| Sample | Total reads | Aligned pairs | Aligned Left | Aligned Right | Concordant rate | Mapped Rate |
|--------|-------------|---------------|--------------|---------------|-----------------|-------------|
| WT-1   | 31643854    | 12070743      | 13583897     | 12648229      | 75.50%          | 82.90%      |
| WT-2   | 27481018    | 10411795      | 11566748     | 10873734      | 75.00%          | 81.66%      |
| WT-3   | 29008036    | 11071327      | 12318887     | 11589616      | 75.60%          | 82.42%      |
| CA_1   | 25128312    | 9524108       | 10610783     | 9943999       | 74.70%          | 81.80%      |
| CA_2   | 26300082    | 10235273      | 11369403     | 10710591      | 76.80%          | 83.95%      |
| CA_3   | 21436846    | 8016529       | 9234958      | 8464881       | 73.80%          | 82.57%      |
| DN_1   | 21526246    | 8317546       | 9380194      | 8749072       | 74.80%          | 84.22%      |
| DN_2   | 28661096    | 11155136      | 12482728     | 11734388      | 75.50%          | 84.49%      |
| DN_3   | 27440216    | 10458483      | 11683000     | 11015613      | 73.80%          | 82.72%      |

**B**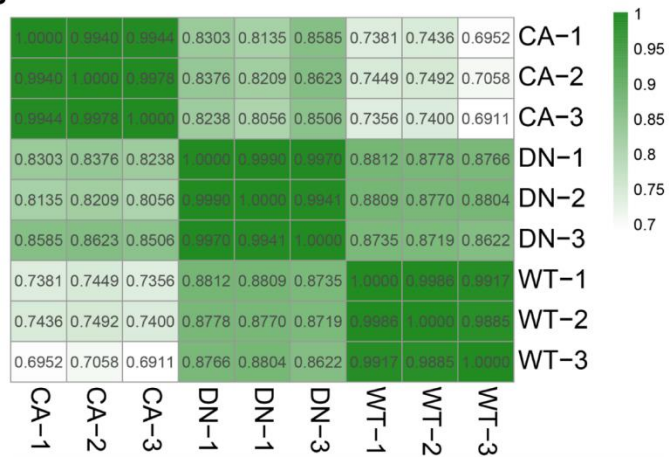

**Figure S2 (A)** Alignment result of Tophat. **(B)** Pairwise Pearson Correlation Coefficient of each two samples.

**Table S1** qRT-PCR Primers used to validate RNA-seq reproducibility.

| Name       | Sequence                | Description                     |
|------------|-------------------------|---------------------------------|
| Rho3qF     | CTATGGGATACAGCAGGACAAG  | Rho3                            |
| Rho3qR     | GACCGAATAGCAGAGCATGA    |                                 |
| MGG_02378F | CCAGACTTGGAATGGGACTTT   | Glutamate decarboxylase 1       |
| MGG_02378R | GGATAGACAAGGCCGTACTTATG |                                 |
| MGG_06888F | GCAAAGGGCTACGGTACTT     | Glutamine synthetase            |
| MGG_06888R | CCAAAGCAGGTCTCCATGATAA  |                                 |
| MGG_15990F | CTCTTCAGCAGCTTCGTCATT   | Hypothetical protein            |
| MGG_15990R | CCGTTGACGACCACAAACA     |                                 |
| MGG_09261F | GAGCATGATGACCACCTTCA    | Hypothetical protein            |
| MGG_09261R | TTAGACACCACGGAAATCCTC   |                                 |
| MGG_04913F | GGACATCAGCTTCAACATGGA   | CVNH domain-containing protein  |
| MGG_04913R | GGTTGATATCGGCATCGTGAA   |                                 |
| MGG_16585F | CCCGTCCAGCCACTGTA       | Hypothetical protein            |
| MGG_16585R | ATCGCTGCAGACGCAGA       |                                 |
| MGG_10098F | GATGGTGGCGGATTGGAA      | Kelch motif protein             |
| MGG_10098R | TCGAGAACATCGGCAAAGAG    |                                 |
| MGG_00832F | GACGACGAGATGTTTGTGTTTG  | Cytochrome P450                 |
| MGG_00832R | GGATGACGTGACTGTTGGT     |                                 |
| MGG_12763F | GACCAACACACCTGAGAACAC   | Hypothetical protein            |
| MGG_12763R | CGCATCATCGTCGTCATTGT    |                                 |
| MGG_07216F | GAGGGTCTGGCAAACATGAA    | versicolorin reductase          |
| MGG_07216R | CGTTGATCCATTCACTCTCCTC  |                                 |
| MGG_08535F | CTTTCACCGGCATCAACAAC    | Hypothetical protein            |
| MGG_08535R | GTGAAGAAGAAGGCCAGGAA    |                                 |
| MGG_12316F | CCACCTTTGAGGATGAGTACAA  | GTP-binding protein EsdC        |
| MGG_12316R | CGGTAGTACGAGGACAGGT     |                                 |
| MGG_07571F | TCACCATGACCCAGCTCTAT    | LysM domain-containing protein  |
| MGG_07571R | AACATGCACGCACATGTAGTA   |                                 |
| MGG_08989F | CCGTGGACACTCTTGACTTT    | Adh short protein               |
| MGG_08989R | CTCGGGCTGGAACCTTTTG     |                                 |
| MGG_14715F | GCAGGATAGCTGGGTTGTTA    | Hypothetical protein            |
| MGG_14715R | GCTCGTAGGTCACGTTGATAG   |                                 |
| MGG_08355F | CATCATCAACTACGCCTTCGAC  | Hypothetical protein            |
| MGG_08355R | GGCACTGCTTGCCGTAAA      |                                 |
| MGG_10275F | GCTCGACTACACCGTCTACTA   | Sphingomyelin phosphodiesterase |
| MGG_10275R | CTTGACCGAGTACAGCTTCTG   |                                 |
| MGG_16714F | TCTCCTGCGCTGCACAA       | Hypothetical protein            |
| MGG_16714R | ATCCGTCAAGATCGCACTCC    |                                 |
| MoTubQRTF  | TCCGTGGAAAGGTTTCCATG    | beta-tubulin                    |
| MoTubQRTR  | ATCCACTCGACGAAGTACGA    |                                 |

**Table S2** Quality and filter result of RNA-seq sequencing reads.

| Sample  | Raw Reads  | Clean Reads | Raw Base(G) | Clean Base(G) | Effective Rate(%) | Error Rate(%) | Q20(%) | Q30(%) | GC Content(%) |
|---------|------------|-------------|-------------|---------------|-------------------|---------------|--------|--------|---------------|
| WT-rep1 | 16,616,855 | 15,821,927  | 4.99        | 4.75          | 95.22             | 0.02          | 97.5   | 94.22  | 56.28         |
| WT-rep2 | 14,433,110 | 13,740,509  | 4.33        | 4.12          | 95.2              | 0.02          | 97.69  | 94.6   | 55.89         |
| WT-rep3 | 15,274,575 | 14,504,018  | 4.58        | 4.35          | 94.96             | 0.02          | 97.69  | 94.63  | 55.95         |
| CA-rep1 | 12,840,099 | 12,564,156  | 3.85        | 3.77          | 97.85             | 0.02          | 97.22  | 93.8   | 54.86         |
| CA-rep2 | 13,387,146 | 13,150,041  | 4.02        | 3.94          | 98.23             | 0.02          | 97.35  | 94.06  | 55.56         |
| CA-rep3 | 10,905,512 | 10,718,423  | 3.27        | 3.22          | 98.28             | 0.03          | 96.38  | 92.06  | 55.78         |
| DN-rep1 | 10,947,764 | 10,763,123  | 3.28        | 3.23          | 98.31             | 0.02          | 97.06  | 93.54  | 55.58         |
| DN-rep2 | 14,598,478 | 14,330,548  | 4.38        | 4.3           | 98.16             | 0.02          | 97.16  | 93.75  | 55.45         |
| DN-rep3 | 13,994,549 | 13,720,108  | 4.2         | 4.12          | 98.04             | 0.02          | 97.24  | 93.86  | 55.3          |
